# Supplementary material for: Etomoxir-carnitine, a novel pharmaco-metabolite of etomoxir, inhibits phospholipases A2 and mitochondrial respiration
Source: PubMed Central journal article supplement (PMC11402452; doi:10.1016/j.jlr.2024.100611), 2024-07-31
Supplement: mmc1.pdf [file mmc1.pdf]

Figure S1.

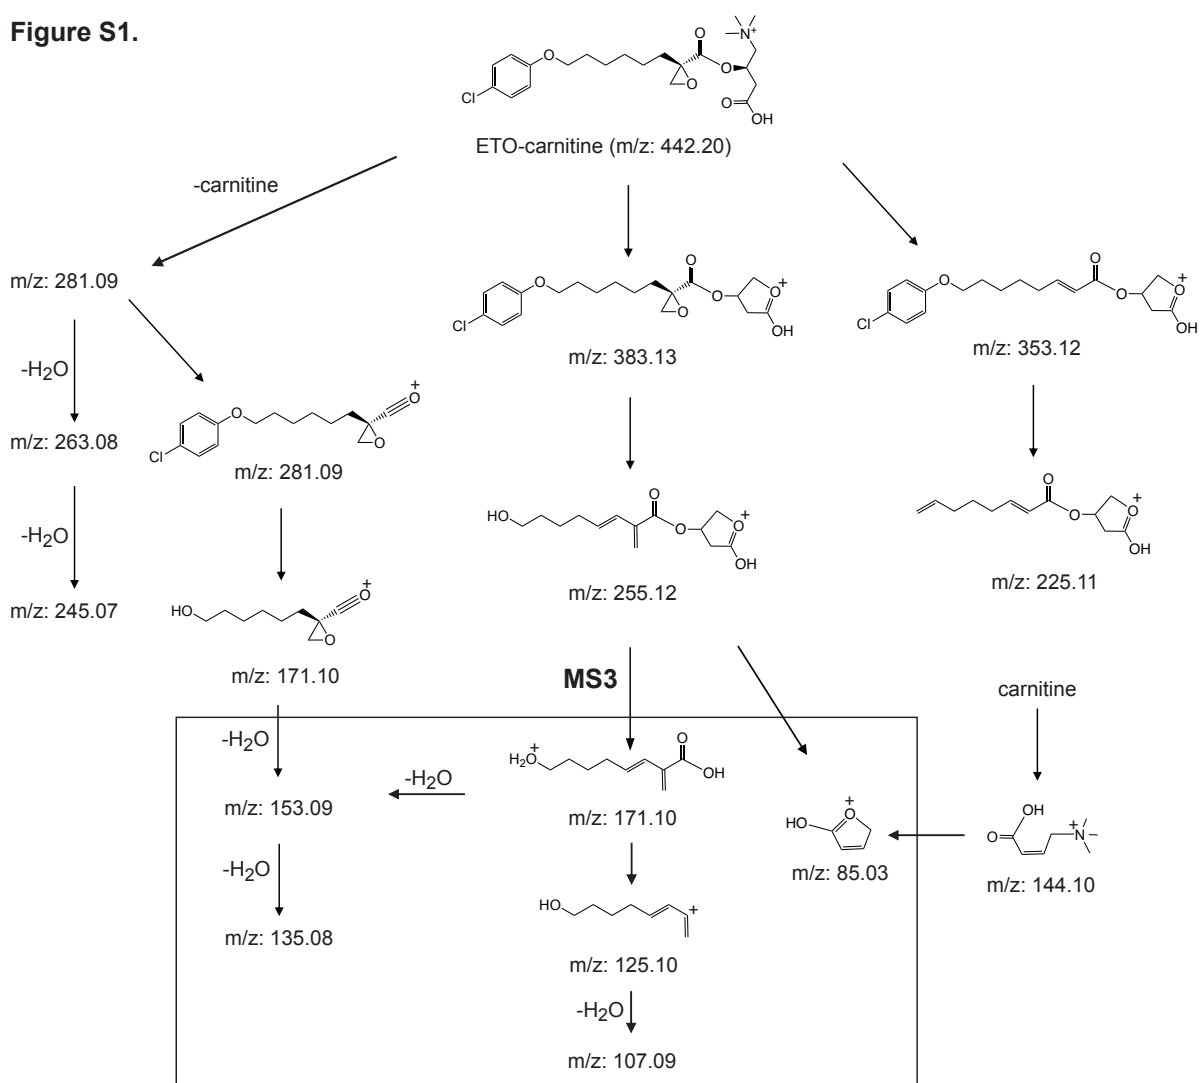

Supplemental Figure S1. Proposed MS<sup>2</sup> fragmentation for etomoxir-carnitine, followed by MS<sup>3</sup> fragmentation for the MS<sup>2</sup> fragment ion at m/z=255.12.

Figure S2.

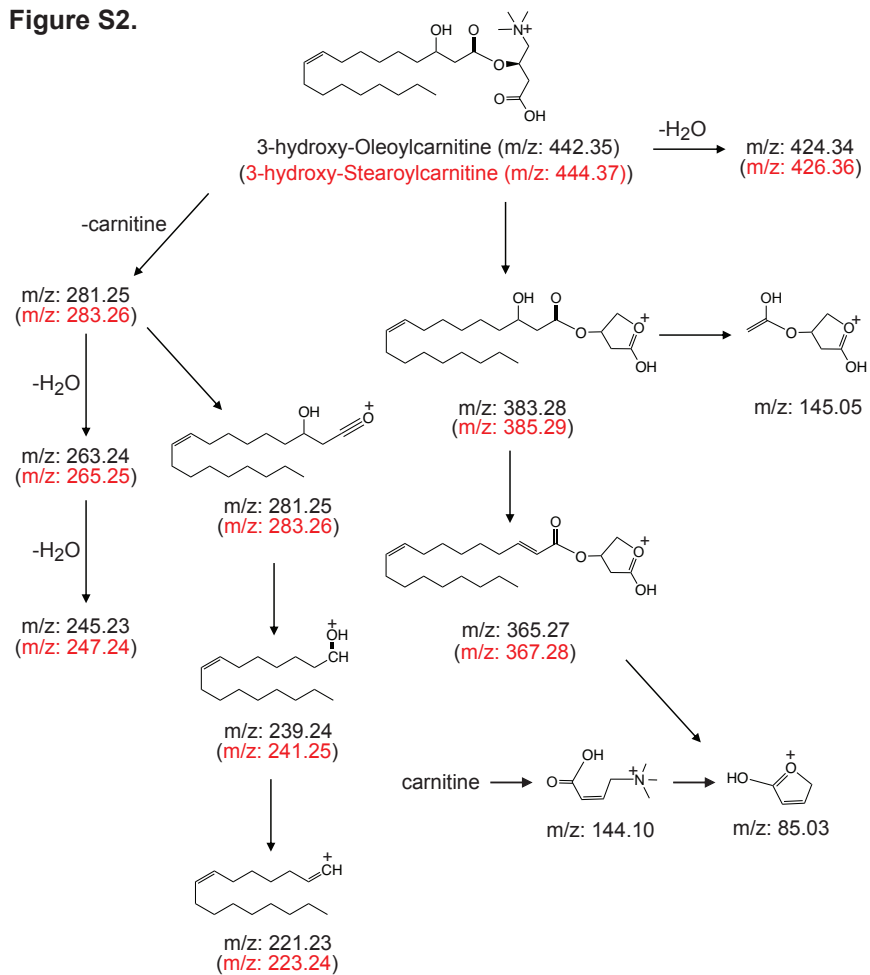

Supplemental Figure S2. Proposed MS<sup>2</sup> fragmentation for 3-hydroxy-Oleoylcarnitine and 3-hydroxy-Stearoylcarnitine.

**Figure S3.**

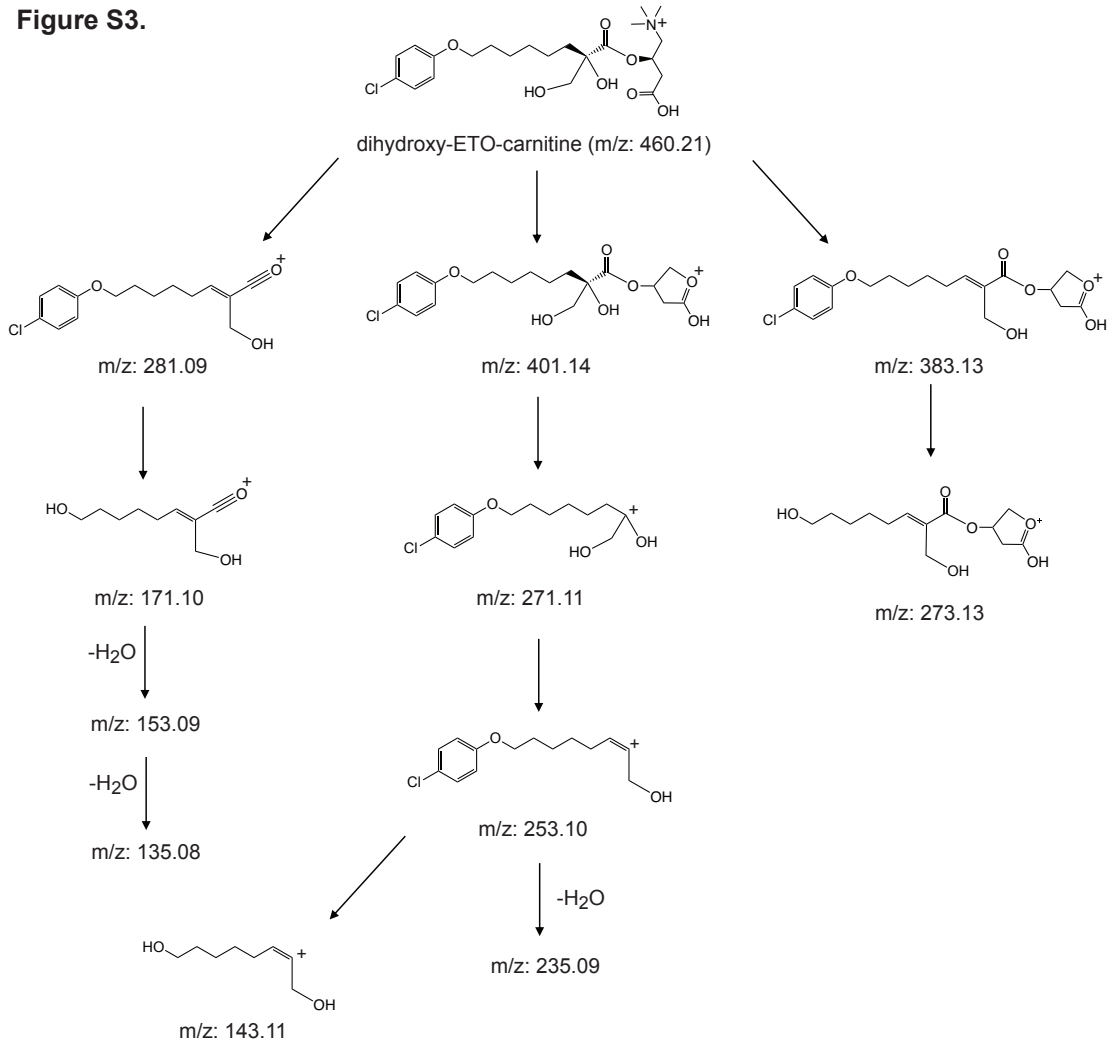

**Supplemental Figure S3. Proposed MS<sup>2</sup> fragmentation for the water-adduct of etomoxir-carnitine (dihydroxy-ETO-carnitine).**
